# Supplementary material
Source: PubMed Central journal article supplement (PMC1276721)
Supplement: 7600838s2.pdf [file 7600838s2.pdf]

**Snaith, Samejima and Sawin, 2005: Supplementary Figure 2**

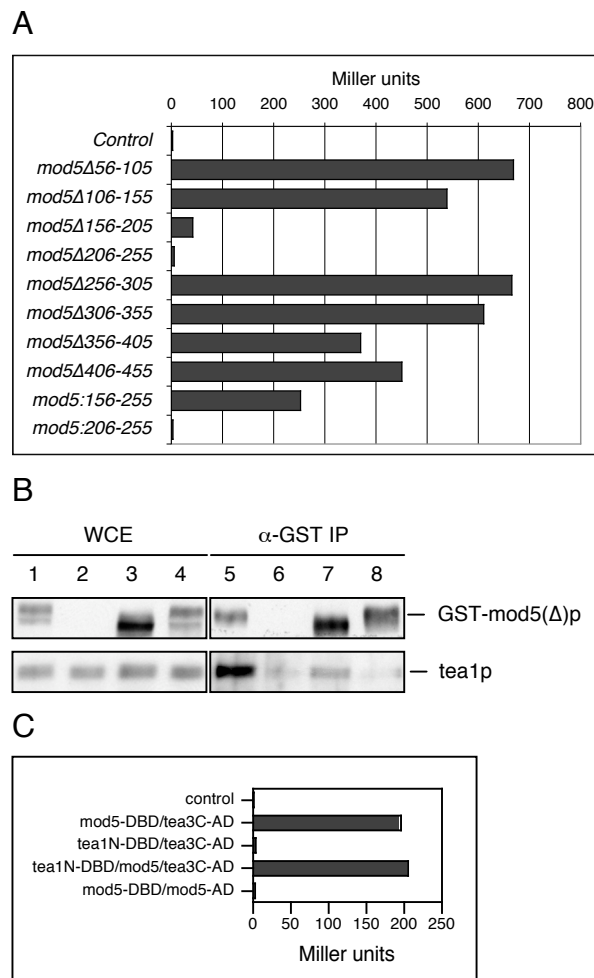

**Supplementary Figure 2: Mod5p amino acids 156-255 interact with tea1p and tea3p**

**(A)** Betagalactosidase activity in *S. cerevisiae* strains expressing tea3p amino acids 513-1125 fused to the Gal4 activation domain and different internal-deletions of mod5p, or small fragments of mod5p (amino acids 206-255 or 156-255), fused to the LexA DNA binding domain of *pBTM116-1* (See Suppl. Table 1 for further details). Activity is expressed in Miller units. **(B)** Immunoprecipitations of GST-mod5p from soluble protein extracts in wild-type cells expressing GST-mod5p (lanes 1 and 5), *mod5Δ* cells (lanes 2 and 6), cells expressing GST-mod5Δ156-205p (lanes 3 and 7) and cells expressing GST-mod5Δ206-255p (lanes 4 and 8). The resulting immunocomplexes were analyzed for GST-mod5p and tea1p. Whole cell extract fractions are shown in lanes 1-4 and immunoprecipitates in lanes 5-8. **(C)** Betagalactosidase activity in *S. cerevisiae* strains expressing combinations of tea1p amino acids 1-500 fused to the LexA DNA binding domain (tea1N-DBD), untagged mod5p amino acids 1-519 (mod5), mod5p amino acids 1-519 fused to the LexA DNA binding domain (mod5-DBD), mod5p amino acids 1-519 fused to the Gal4 activation domain (mod5-AD), or tea3p amino acids 739-1125 fused to the Gal4 activation domain (tea3C-AD). Note that tea1N-DBD and tea3C-AD interact only when mod5p is co-expressed, and that mod5p does not interact with itself. Activity is expressed in Miller units.
