# Supplementary material
Source: PubMed Central journal article supplement (PMC1276721)
Supplement: 7600838s5.pdf [file 7600838s5.pdf]

## SUPPLEMENTARY MATERIALS AND METHODS

### Two-hybrid screen

To ensure that the *mod5*p bait was successfully translocated to the nucleus and not targeted to the plasma membrane, the C-terminal prenylation motif was removed. The *mod5* cDNA sequence was cloned into the two-hybrid LexA bait vector *pBTM116* (Vojtek and Cooper, 1993) and transformed into the *S. cerevisiae* two-hybrid test strain L40 (Hollenberg et al., 1995).  $2 \times 10^6$  prey plasmids from a meiotic *S. pombe* library were screened for *mod5*-interacting clones. 10 of the 11 clones obtained showed strong interaction with *mod5*, while the 11th showed only a weak interaction and contained a fragment of the gene encoding the 14-3-3 protein rad24p (Bridges and Moorhead, 2004; Ford et al., 1994). The *mod5* internal deletions additionally lacking the C-terminal prenylation sequence, *mod5:156-255* and *mod5:206-255*, were cloned into the *pBTM116-1* vector to test their ability to interact with *tea3p* in *S. cerevisiae* L40. We were unable to clone *mod5* $\Delta$ 1-55 into *pBTM116-1*. Semi-quantitative assays of betagalactosidase expression in two-hybrid strains expressing combinations of *tea1p*, *mod5p* and *tea3p* were carried out using 2-nitrophenol- $\beta$ -D-galactopyranoside (ONPG; Sigma) as a substrate.

### Biochemical experiments

*GST pulldowns from fission yeast extracts:* 400-500 mg of frozen cell pellets were ground with a mortar and pestle under liquid nitrogen and extracts prepared in 20 mM NaHEPES pH 7.5, 50 mM KAcetate, 200 mM NaCl, 1 mM EDTA, 1 mM DTT, 1% Triton X-100. Samples were incubated with 25  $\mu$ l GSH agarose beads (Sigma, UK) for 3 h at 5°C. All samples were separated on 8% SDS PAGE and subjected to western blotting.

Supplementary Information: Snaith et al.

*In vitro transcription and translation:* Fragments of *tea1p* and *tea3p* were amplified by a 2 step PCR protocol to include the T7 promoter at the 5' end, and three haemagglutinin tags at the 3' end, and expressed by *in vitro* translation according to the manufacturer's instructions (TnT® T7 Quick for PCR DNA, Promega, Southampton, UK). GST-mod5p(28-447) and GST-GFP were purified from bacteria following standard protocols, and *in vitro* binding assays were performed as described (Samejima et al., 2005).

### **Construction of *mod5* internal deletion mutants**

Initially, DNA fragments 5' and 3' of the desired deletion were amplified by PCR to include a common amino-acid linker sequence GGSAGSA that would replace the deleted amino acids. Pairs of PCR fragments were then combined and used as mega-primers in a second round of PCR to produce the final *mod5p* deletion sequences. Each deletion fragment retained the C-terminal prenylation signal to ensure correct membrane-targeting, and was cloned 3' to the *nmt81* promoter fused to GFP in pKM074 (*leu1+* in pBluescript). The resulting plasmids were integrated into the *leu1* locus of *mod5Δ* cells. The expression level of each *mod5p* internal deletion protein in EMM liquid media was confirmed by western blot with anti-GFP antibodies and adjusted to wild-type levels by the addition of 150 nM thiamine. Deletions of amino acids 156-205 and 206-255 at the endogenous *mod5+* locus were constructed by first inserting the *ura4+* gene between nucleotides 580 and 680 of *mod5*, and then replacing *ura4+* under 5-fluoroorotic acid (5-FOA) selection with PCR generated fragments of *mod5* lacking the sequence encoding amino acids 156-205 or 206-255.

### **Construction of mCherry and tdTomato tagging plasmids**

To construct plasmids for PCR-mediated tagging of yeast genes with mCherry (mCh) and tdimerTomato (tdT) (Shaner et al., 2004), we followed a strategy to make these identical to the tagging plasmids of Bahler et al. (1998), except for the tag itself. The mCh and tdT open reading frames were amplified by PCR, using pRSETB-mCh and pRSETB-tdT plasmids as templates, kindly provided by Dr. R. Tsien, HHMI, UCSD. The PCR products were cloned into pGEM-T Easy (Promega), sequenced and subcloned into PacI and AscI sites of the appropriate C-terminal tagging vectors (Bahler et al., 1998; Goldstein and McCusker, 1999; Kim et al., 2005). N-terminal tagging vectors were made in the same manner as by Bahler *et al.*, by excising PacI/BglII fragments containing the mCh and tdT sequences from the C-terminal tagging plasmids and subcloning these fragments into PacI/BamHI sites of pFA6a-kanMX6-P3nmt1, pFA6a-kanMX6-P41nmt1 and pFA6a-kanMX6-P81nmt1. Our plasmid nomenclature therefore follows that of Bahler et al. (1998).

A single point mutation was identified in all tdT plasmids constructed, and we subsequently determined that this was also in the parent plasmid pRSETB-tdT. Nucleotide 1244 of the tdT coding sequence was expected to be A but found to be G, converting CAC (His) into CGC (Arg). However, the corresponding bases in the first half of the tdT coding sequence are correct. As far as we know, this mutation is unlikely to affect the properties of the protein.

In order to make a junction that is more compatible for protein fusions, Shaner et al. (2004) added seven amino acids of GFP sequence to both N- and C-termini of both mCherry and tdTomato, and the codons used differ from those used in the GFP-tagging plasmid pFA6a-GFP(S65T)-kanMX6 of Bahler et al. (1998) This does not affect the primer sequence for PCR amplification of cassettes used in C-terminal tagging (i.e.,

Supplementary Information: Snaith et al.

plasmids pKS390-pKS393); for these one can use the sequences of Bahler et al. (1998), which hybridize to the linker. However, for N-terminal tagging cassettes (pKS394-pKS399), a different primer sequence is required. The final codons of mCh and tdT are (C) GGC ATG GAC GAG CTG TAC AAG TAA, which encode the amino acids GMDELYK-stop. Therefore, the reverse primer for gene tagging should be: 5'-(gene specific sequence)-CTT GTA CAG CTC GTC CAT GCC (G)-3' (The final G is optional).

#### Summary of new tagging plasmids, nomenclature following Bahler et al. (1998):

| Plasmid       | Description                          | Reference  |
|---------------|--------------------------------------|------------|
| <i>pKS390</i> | <i>pFA6a-mCherry-kanMX6</i>          | This study |
| <i>pKS391</i> | <i>pFA6a-mCherry-natMX6</i>          | This study |
| <i>pKS392</i> | <i>pFA6a-tdTomato-kanMX6</i>         | This study |
| <i>pKS393</i> | <i>pFA6a-tdTomato-natMX6</i>         | This study |
| <i>pKS394</i> | <i>pFA6a-kanMX6-P3nmt1-mCherry</i>   | This study |
| <i>pKS395</i> | <i>pFA6a-kanMX6-P41nmt1-mCherry</i>  | This study |
| <i>pKS396</i> | <i>pFA6a-kanMX6-P81nmt1-mCherry</i>  | This study |
| <i>pKS397</i> | <i>pFA6a-kanMX6-P3nmt1-tdTomato</i>  | This study |
| <i>pKS398</i> | <i>pFA6a-kanMX6-P41nmt1-tdTomato</i> | This study |
| <i>pKS399</i> | <i>pFA6a-kanMX6-P81nmt1-tdTomato</i> | This study |

#### Microscopy

For still images of tea3p-GFP, Z-series of 6 sections with 0.5 $\mu$ m spacing were acquired using the appropriate neutral density filters, and for timelapse movie analysis of tea3p-GFP Z-series of 5 sections with 0.5  $\mu$ m spacing were collected at 15 s intervals (with neutral density filters). For time lapse Z-series acquisition of cells doubly labelled with tea3p-mCh and either tea1p-GFP or GFP-atb2p, Z-series of 4 sections at 0.6  $\mu$ m spacing were collected with exposure times of 1200 ms for mCh and 800 ms for mCh, at 15 s intervals (with neutral density filters)

## SUPPLEMENTARY TABLES

Supplementary Table 1: Plasmids used in this study

| Plasmid       | Description                               | Reference                 |
|---------------|-------------------------------------------|---------------------------|
| <i>pKS183</i> | <i>pBTM116</i>                            | (Vojtek and Cooper, 1993) |
| <i>pKS185</i> | <i>pBTM116-1</i>                          | (Vojtek and Cooper, 1993) |
| <i>pKS135</i> | <i>pGAD424</i>                            | (Bartel et al., 1993)     |
| <i>pKS156</i> | <i>pAA</i>                                | (Chang et al., 1994)      |
| <i>pKS182</i> | <i>mod5aal-519</i> in <i>pBMT116</i>      | This study                |
| <i>pKS148</i> | <i>tea3aa739-1125</i> in <i>pGAD424</i>   | This study                |
| <i>pKS173</i> | <i>tea3aa513-1125</i> in <i>pGAD424</i>   | This study                |
| <i>pKS383</i> | <i>mod5aal-519</i> in <i>pGAD424</i>      | This study                |
| <i>pKS384</i> | <i>mod5aal-519</i> in <i>pAA</i>          | This study                |
| <i>pKS385</i> | <i>tea1aal-500</i> in <i>pBTM116</i>      | This study                |
| <i>pKS21</i>  | <i>GFP</i> in <i>pGEX-4T1</i>             | Laboratory stock          |
| <i>pKS181</i> | <i>mod5aa28-447</i> in <i>pGEX-4T3</i>    | This study                |
| <i>pKS235</i> | <i>tea1aal-1147</i> in <i>pGEM-T</i>      | This study                |
| <i>pKS186</i> | <i>tea3aal-1125</i> in <i>pBS-KS</i>      | This study                |
| <i>pKS212</i> | <i>mod5Δ56-105</i> in <i>pBTM116-1</i>    | This study                |
| <i>pKS199</i> | <i>mod5Δ106-155</i> in <i>pBTM116-1</i>   | This study                |
| <i>pKS254</i> | <i>mod5Δ156-205</i> in <i>pBTM116-1</i>   | This study                |
| <i>pKS256</i> | <i>mod5Δ206-255</i> in <i>pBTM116-1</i>   | This study                |
| <i>pKS202</i> | <i>mod5Δ256-305</i> in <i>pBTM116-1</i>   | This study                |
| <i>pKS203</i> | <i>mod5Δ306-355</i> in <i>pBTM116-1</i>   | This study                |
| <i>pKS204</i> | <i>mod5Δ356-405</i> in <i>pBTM116-1</i>   | This study                |
| <i>pKS205</i> | <i>mod5Δ406-455</i> in <i>pBTM116-1</i>   | This study                |
| <i>pKS233</i> | <i>mod5aal156-205</i> in <i>pBMM116-1</i> | This study                |
| <i>pKS237</i> | <i>mod5aal156-255</i> in <i>pBTM116-1</i> | This study                |
| <i>pKS190</i> | <i>nmt81GFP</i> in <i>pKM074</i>          | From H. Ohkura            |
| <i>pKS136</i> | <i>mod5Δ1-55</i> in <i>pKS190</i>         | This study                |
| <i>pKS137</i> | <i>mod5Δ56-105</i> in <i>pKS190</i>       | This study                |
| <i>pKS138</i> | <i>mod5Δ106-155</i> in <i>pKS190</i>      | This study                |
| <i>pKS247</i> | <i>mod5Δ156-205</i> in <i>pKS190</i>      | This study                |
| <i>pKS249</i> | <i>mod5Δ206-255</i> in <i>pKS190</i>      | This study                |
| <i>pKS141</i> | <i>mod5Δ256-305</i> in <i>pKS190</i>      | This study                |
| <i>pKS142</i> | <i>mod5Δ306-355</i> in <i>pKS190</i>      | This study                |
| <i>pKS143</i> | <i>mod5Δ356-405</i> in <i>pKS190</i>      | This study                |
| <i>pKS144</i> | <i>mod5Δ406-455</i> in <i>pKS190</i>      | This study                |
| <i>pKS145</i> | <i>mod5Δ456-519</i> in <i>pKS190</i>      | This study                |
| <i>pKS146</i> | <i>mod5aal-522</i> in <i>pKS190</i>       | This study                |
| <i>pKS386</i> | <i>pRSETB-mCherry</i>                     | Shaner et al., 2004       |
| <i>pKS387</i> | <i>pRSETB-tdTomato</i>                    | Shaner et al., 2004       |

**Supplementary Table 2: Yeast strains used in this study**

| <b><i>S. pombe</i> strains</b> |                                                                                  |                          |
|--------------------------------|----------------------------------------------------------------------------------|--------------------------|
| <b>Strain</b>                  | <b>Genotype</b>                                                                  | <b>Reference</b>         |
| KS136                          | <i>h- tea1Δ::ura4+ ade6-M210 ura4-D18</i>                                        | (Mata and Nurse, 1997)   |
| KS515                          | <i>h+ ade6-M216 leu1-32 ura4-D18</i>                                             | Lab strain               |
| KS564                          | <i>h- orb2-34 ade6-M216 leu1-32 ura4-D18</i>                                     | This study               |
| KS706                          | <i>h- kanMX6:nmt81GFPmod5 ade6-M210 leu1-32 ura4-D18</i>                         | (Snaith and Sawin, 2003) |
| KS753                          | <i>h- mod5Δ::kanMX6 tea1Δ::ura4+ ade6-M210 ura4-D18</i>                          | (Snaith and Sawin, 2003) |
| KS780                          | <i>h+ mod5Δ::kanMX6 ade6-M216 leu1-32 ura4-D18</i>                               | (Snaith and Sawin, 2003) |
| KS781                          | <i>h- tip1Δ::kanMX6 ade6-M210 leu1-32 ura4-D18</i>                               | This study               |
| KS1066                         | <i>h+ p[nmt81GFPmod5Δ1-55:leu1+]:leu1-32 mod5Δ::kanMX6 ade6-M216 ura4-D18</i>    | This study               |
| KS1069                         | <i>h+ p[nmt81GFPmod5Δ56-105:leu1+]:leu1-32 mod5Δ::kanMX6 ade6-M216 ura4-D18</i>  | This study               |
| KS1071                         | <i>h+ p[nmt81GFPmod5Δ106-155:leu1+]:leu1-32 mod5Δ::kanMX6 ade6-M216 ura4-D18</i> | This study               |
| KS1075                         | <i>h+ p[nmt81GFPmod5Δ206-255:leu1+]:leu1-32 mod5Δ::kanMX6 ade6-M216 ura4-D18</i> | This study               |
| KS1076                         | <i>h+ p[nmt81GFPmod5Δ256-305:leu1+]:leu1-32 mod5Δ::kanMX6 ade6-M216 ura4-D18</i> | This study               |
| KS1078                         | <i>h+ p[nmt81GFPmod5Δ306-355:leu1+]:leu1-32 mod5Δ::kanMX6 ade6-M216 ura4-D18</i> | This study               |
| KS1080                         | <i>h+ p[nmt81GFPmod5Δ356-405:leu1+]:leu1-32 mod5Δ::kanMX6 ade6-M216 ura4-D18</i> | This study               |
| KS1082                         | <i>h+ p[nmt81GFPmod5Δ406-455:leu1+]:leu1-32 mod5Δ::kanMX6 ade6-M216 ura4-D18</i> | This study               |
| KS1086                         | <i>h+ p[nmt81GFPmod5 1-522:leu1+]:leu1-32 mod5Δ::kanMX6 ade6-M216 ura4-D18</i>   | This study               |
| KS1098                         | <i>h+ kanMX6:nmt41GSTmod5 ade6-M210 leu1-32 ura4-D18</i>                         | This study               |
| KS1141                         | <i>h+ p[nmt81GFPmod5Δ1-55:leu1+]:leu1-32 ade6-M216 ura4-D18</i>                  | This study               |
| KS1143                         | <i>h- p[nmt81GFPmod5Δ56-105:leu1+]:leu1-32 ade6-M216 ura4-D18</i>                | This study               |
| KS1144                         | <i>h+ p[nmt81GFPmod5Δ106-155:leu1+]:leu1-32 ade6-M216 ura4-D18</i>               | This study               |
| KS1145                         | <i>h+ p[nmt81GFPmod5Δ156-205:leu1+]:leu1-32 ade6-M216 ura4-D18</i>               | This study               |
| KS1147                         | <i>h+ p[nmt81GFPmod5Δ206-255:leu1+]:leu1-32 ade6-M216 ura4-D18</i>               | This study               |
| KS1148                         | <i>h+ p[nmt81GFPmod5Δ256-305:leu1+]:leu1-32 ade6-M216 ura4-D18</i>               | This study               |
| KS1149                         | <i>h+ p[nmt81GFPmod5Δ306-355:leu1+]:leu1-32 ade6-M216 ura4-D18</i>               | This study               |

## Supplementary Information: Snaith et al.

|        |                                                                                                |                           |
|--------|------------------------------------------------------------------------------------------------|---------------------------|
| KS1150 | <i>h+ p[nmt81GFPmod5Δ356-405:leu1+]:leu1-32 ade6-M216 ura4-D18</i>                             | This study                |
| KS1151 | <i>h+ p[nmt81GFPmod5Δ406-455:leu1+]:leu1-32 ade6-M216 ura4-D18</i>                             | This study                |
| KS1153 | <i>h+ p[nmt81GFPmod5 1-522:leu1+]:leu1-32 ade6-M216 ura4-D18</i>                               | This study                |
| KS1160 | <i>h- tea3Δ::kanMX6 leu1-32 ura4-D18</i>                                                       | (Arellano et al., 2002)   |
| KS1161 | <i>h+ tea3GFP::kanMX6 leu1-32 ura4-D18</i>                                                     | (Arellano et al., 2002)   |
| KS1171 | <i>h- kanMX6:nmt81GFPmod5 tea3Δ::his3+ ade6-M210 his3-D1 leu1-32 ura4-D18</i>                  | This study                |
| KS1222 | <i>h+ mod5Δ::kanMX6 tea3GFP::kanMX6 ade6-M210 leu1-32 ura4-D18</i>                             | This study                |
| KS1224 | <i>h- tea3GFP::kanMX6 tea1Δ::ura4+ ade6-M210 leu1-32 ura4-D18</i>                              | This study                |
| KS1264 | <i>h- tea3Δ::kanMX6 tea1Δ::ura4+ ade6-M210 leu1-32 ura4-D18</i>                                | This study                |
| KS1267 | <i>h+ mod5Δ::kanMX6 tea3Δ::kanMX6 ade6-M216 leu1-32 ura4-D18</i>                               | This study                |
| KS1310 | <i>h+ mod5Δ::kanMX6 tip1Δ::kanMX6 ade6-M216 leu1-32 ura4-D18</i>                               | This study                |
| KS1419 | <i>h- tea1Δ200::kanMX6 ade6-M216 leu1-32 ura4-D18</i>                                          | (Behrens and Nurse, 2002) |
| KS1443 | <i>h+ kanMX6:nmt81GFPmod5 tea1Δ200::kanMX6 ade6-M216 leu1-32 ura4-D18</i>                      | This study                |
| KS1690 | <i>h+ mod5Δ::kanMX6 p[nmt81GFPmod5Δ156-205:leu1+]:leu1-32 ade6-M216 ura4-D18</i>               | This study                |
| KS1749 | <i>h+ kanMX6:nmt41GSTmod5 tea3Δ::kanMX6 ade6-M210 leu1-32 ura4-D18</i>                         | This study                |
| KS1753 | <i>h+ kanMX6:nmt41GSTmod5 tea3GFP::kanMX6 tea1Δ::ura4+ ade6-M16 leu1-32 ura4-D18</i>           | This study                |
| KS1891 | <i>h+ mod5Δ156-205 ade6-M216 leu1-32 ura4-D18</i>                                              | This study                |
| KS1892 | <i>h+ mod5Δ206-255 ade6-M216 leu1-32 ura4-D18</i>                                              | This study                |
| KS1927 | <i>h+ kanMX6:nmt41GSTmod5Δ156-205 ade6-M216 leu1-32 ura4-D18</i>                               | This study                |
| KS1928 | <i>h+ kanMX6:nmt41GSTmod5Δ206-255 ade6-M216 leu1-32 ura4-D18</i>                               | This study                |
| KS1929 | <i>h+ tea3HA::kanMX6 ade6-M216 leu1-32 ura4-D18</i>                                            | This study                |
| KS1947 | <i>h- mod5Δ::kanMX6 tea3HA::kanMX6 ade6-M216 ura4-D18</i>                                      | This study                |
| KS2048 | <i>h+ tip1Δ::kanMX6 p[nmt81GFPmod5Δ1-55:leu1+]:leu1-32 mod5Δ::kanMX6 ade6-M210 ura4-D18</i>    | This study                |
| KS2049 | <i>h+ tip1Δ::kanMX6 p[nmt81GFPmod5Δ56-105:leu1+]:leu1-32 mod5Δ::kanMX6 ade6-M210 ura4-D18</i>  | This study                |
| KS2050 | <i>h+ tip1Δ::kanMX6 p[nmt81GFPmod5Δ106-155:leu1+]:leu1-32 mod5Δ::kanMX6 ade6-M210 ura4-D18</i> | This study                |
| KS2051 | <i>h+ tip1Δ::kanMX6 p[nmt81GFPmod5Δ156-205:leu1+]:leu1-32 mod5Δ::kanMX6 ade6-M210 ura4-D18</i> | This study                |
| KS2052 | <i>h+ tip1Δ::kanMX6 p[nmt81GFPmod5Δ206-255:leu1+]:leu1-32 mod5Δ::kanMX6 ade6-M210 ura4-D18</i> | This study                |
| KS2053 | <i>h+ tip1Δ::kanMX6 p[nmt81GFPmod5Δ256-305:leu1+]:leu1-32 mod5Δ::kanMX6 ade6-M210 ura4-D18</i> | This study                |

## Supplementary Information: Snaith et al.

|        |                                                                                                |            |
|--------|------------------------------------------------------------------------------------------------|------------|
| KS2054 | <i>h+ tip1Δ::kanMX6 p[nmt81GFPmod5Δ306-355:leu1+]:leu1-32 mod5Δ::kanMX6 ade6-M210 ura4-D18</i> | This study |
| KS2055 | <i>h+ tip1Δ::kanMX6 p[nmt81GFPmod5Δ356-405:leu1+]:leu1-32 mod5Δ::kanMX6 ade6-M210 ura4-D18</i> | This study |
| KS2056 | <i>h+ tip1Δ::kanMX6 p[nmt81GFPmod5Δ406-455:leu1+]:leu1-32 mod5Δ::kanMX6 ade6-M210 ura4-D18</i> | This study |
| KS2058 | <i>h+ tip1Δ::kanMX6 p[nmt81GFPmod5 1-522:leu1+]:leu1-32 mod5Δ::kanMX6 ade6-M210 ura4-D18</i>   | This study |
| KS2150 | <i>h- tea3GFP:kanMX6 tea1Δ200::kanMX6 ade6-M216 leu1-32 ura4-D18</i>                           | This study |
| KS2157 | <i>h+ tea3GFP:kanMX6 mod5Δ156-205 ade6-M216 leu1-32 ura4-D18</i>                               | This study |
| KS2158 | <i>h+ tea3GFP:kanMX6 mod5Δ206-255 ade6-M216 leu1-32 ura4-D18</i>                               | This study |
| KS2159 | <i>h+ tea3HA:kanMX6 tea1Δ200::kanMX6 ade6-M216 leu1-32 ura4-D18</i>                            | This study |
| KS2183 | <i>h- tea3GFP:kanMX6 bud6Δ::kanMX6 leu1-32 ura4-D18</i>                                        | This study |
| KS2208 | <i>h- kanMX6:nmt41GSTmod5 tea1Δ200::kanMX6 ade6-M216 leu1-32 ura4-D18</i>                      | This study |
| KS2223 | <i>h- tea3GFP:kanMX6 tea1Δ::ura4+ mod5Δ::kanMX6 ade6-M210 leu1-32 ura4-D18</i>                 | This study |
| KS2526 | <i>h+ tea3-mCherry:natMX6 ade6-M216 leu1-32 ura4-D18</i>                                       | This study |
| KS2534 | <i>h- tea3-mCherry:natMX6 tea1GFP:kanMX6 mod5Δ::natMX6 ade6-M210 leu1-32 ura4-D18</i>          | This study |
| KS2535 | <i>h- natMX6:nmt41GSTmod5 tea3HA:kanMX6 tea1Δ200:kanMX6 ade6-M216 leu1-32 ura4-D18</i>         | This study |
| KS2536 | <i>h+ tea3Δ501-1125HA:kanMX6 ura4-D18 leu1-32 ade6-M216</i>                                    | This study |
| KS2537 | <i>h+ tea3Δ703-1125HA:kanMX6 ura4-D18 leu1-32 ade6-M216</i>                                    | This study |
| KS2538 | <i>h+ tea3Δ901-1125HA:kanMX6 ura4-D18 leu1-32 ade6-M216</i>                                    | This study |
| KS2569 | <i>h- tea3-mCherry:natMX6 kanMX:nmt41GFPabt2 ade6-M216 leu1-32 ura4-D18</i>                    | This study |
| KS2574 | <i>h- tea3-mCherry:natMX6 tea1GFP:kanMX6 ade6-M216 leu1-32 ura4-D18</i>                        | This study |
| KS2576 | <i>h+ tea3-mCherry:natMX6 kanMX6:nmt41GFPatb2 mod5Δ::natMX6 ade6-M210 leu1-32 ura4-D18</i>     | This study |

***S. cerevisiae* strain**

|     |                                                                                                                    |                           |
|-----|--------------------------------------------------------------------------------------------------------------------|---------------------------|
| L40 | <i>MATa his3Δ200 trp-901 leu2-3112 ade2 lys2-801am URA3(LexAop)<sub>8</sub>-lacZ LYS2(lexAop)<sub>4</sub>-HIS3</i> | (Hollenberg et al., 1995) |
|-----|--------------------------------------------------------------------------------------------------------------------|---------------------------|



## SUPPLEMENTARY REFERENCES

- Arellano, M., Niccoli, T. and Nurse, P. (2002) Tea3p is a cell end marker activating polarized growth in *Schizosaccharomyces pombe*. *Curr Biol*, **12**, 751-756.
- Bähler, J., Wu, J.Q., Longtine, M.S., Shah, N.G., McKenzie, A., 3rd, Steever, A.B., Wach, A., Philippsen, P. and Pringle, J.R. (1998) Heterologous modules for efficient and versatile PCR-based gene targeting in *Schizosaccharomyces pombe*. *Yeast*, **14**, 943-951.
- Bartel, P.L., Chien, C.-T., Sternglanz, R. and Fields, S. (1993) Using the two-hybrid system to detect protein-protein interactions. In Hartley, D.A. (ed.), *Cellular Interactions in Development: A Practical Approach*. Oxford University Press, Oxford, pp. 153-179.
- Behrens, R. and Nurse, P. (2002) Roles of fission yeast tea1p in the localization of polarity factors and in organizing the microtubular cytoskeleton. *J Cell Biol*, **157**, 783-793.
- Bridges, D. and Moorhead, G.B. (2004) 14-3-3 proteins: a number of functions for a numbered protein. *Sci STKE*, **2004**, re10.
- Chang, E.C., Barr, M., Wang, Y., Jung, V., Xu, H.P. and Wigler, M.H. (1994) Cooperative interaction of *S. pombe* proteins required for mating and morphogenesis. *Cell*, **79**, 131-141.
- Ford, J.C., al-Khodairy, F., Fotou, E., Sheldrick, K.S., Griffiths, D.J. and Carr, A.M. (1994) 14-3-3 protein homologs required for the DNA damage checkpoint in fission yeast. *Science*, **265**, 533-535.
- Goldstein, A.L. and McCusker, J.H. (1999) Three new dominant drug resistance cassettes for gene disruption in *Saccharomyces cerevisiae*. *Yeast*, **15**, 1541-1553.
- Hollenberg, S.M., Sternglanz, R., Cheng, P.F. and Weintraub, H. (1995) Identification of a new family of tissue-specific basic helix-loop-helix proteins with a two-hybrid system. *Mol Cell Biol*, **15**, 3813-3822.
- Kim, J., Robertson, K., Mylonas, K.J., Gray, F.C., Charapitsa, I. and MacNeill, S.A. (2005) Contrasting effects of Elg1-RFC and Ctf18-RFC inactivation in the absence of fully functional RFC in fission yeast. *Nucleic Acids Res*, **33**, 4078-4089.
- Mata, J. and Nurse, P. (1997) Tea1p and the microtubular cytoskeleton are important for generating global spatial order within the fission yeast cell. *Cell*, **89**, 939-949.
- Samejima, I., Lourenco, P.C., Snaith, H.A. and Sawin, K.E. (2005) Fission yeast mto2p regulates microtubule nucleation by the centrosomin-related protein mto1p. *Mol Biol Cell*, **16**, 3040-3051.
- Shaner, N.C., Campbell, R.E., Steinbach, P.A., Giepmans, B.N., Palmer, A.E. and Tsien, R.Y. (2004) Improved monomeric red, orange and yellow fluorescent proteins derived from *Discosoma* sp. red fluorescent protein. *Nat Biotechnol*, **22**, 1567-1572.
- Snaith, H.A. and Sawin, K.E. (2003) Fission yeast mod5p regulates polarized growth through anchoring of tea1p at cell tips. *Nature*, **423**, 647-651.
- Vojtek, A.B. and Cooper, J.A. (1993) Identification and characterization of a cDNA encoding mouse CAP: a homolog of the yeast adenylyl cyclase associated protein. *J Cell Sci*, **105** ( Pt 3), 777-785.

## **SUPPLEMENTARY MOVIE LEGENDS:**

### **Supplementary Movie 1:**

Wild-type cell expressing tea3p-GFP. Timelapse images were acquired as described in Supplementary Materials and Methods, with cells imaged every 15 seconds. A total of 5 minutes of real-time is shown. Note the lack of significant movement of tea3p-GFP particles in the cytoplasm.

### **Supplementary Movie 2:**

*mod5* $\Delta$  cells expressing tea3p-GFP. Timelapse images were acquired as described in Supplementary Materials and Methods, with cells imaged every 15 seconds. A total of 2.5 minutes of real-time is shown. Note two separate particles of tea3p-GFP moving in linear fashion to opposite cell tips.

### **Supplementary Movie 3:**

*mod5* $\Delta$  *tea1* $\Delta$  cells expressing tea3p-GFP. Timelapse images were acquired as described in Supplementary Materials and Methods, with cells imaged every 15 seconds. A total of 2.5 minutes of real-time is shown. Note the reduced movement of tea3p-GFP particles relative to Supplementary Movie 2.
